# Supplementary material for: Beyond Refeeding: The Effect of Including a Dietitian in Eating Disorder Treatment. A Systematic Review
Source: MDPI journal article supplement (doi:10.3390/nu13124490), 2021-12-15
Supplement: s1 [file s1]

**Table S1:** Search strategy used on the Ovid MEDLINE(R) ALL platform.

|    |                                                                                                                                                                                                                                                                                                                                                                                                                                                                                                                                                      |
|----|------------------------------------------------------------------------------------------------------------------------------------------------------------------------------------------------------------------------------------------------------------------------------------------------------------------------------------------------------------------------------------------------------------------------------------------------------------------------------------------------------------------------------------------------------|
| 1  | exp "Feeding and Eating Disorders"/                                                                                                                                                                                                                                                                                                                                                                                                                                                                                                                  |
| 2  | (eating disorder* or disordered eating or anorexi* or bulimi* or binge or feeding disorder* or orthorexia or muscle dysmorphia or rumination disorder* or purging disorder* or night eating syndrome or intake disorder* or ARFID or EDNOS or OSFED or UFED or PICA).ti. or (eating disorder* or disordered eating or anorexi* or bulimi* or binge or feeding disorder* or orthorexia or muscle dysmorphia or rumination disorder* or purging disorder* or night eating syndrome or intake disorder* or ARFID or EDNOS or OSFED or UFED or PICA).ab. |
| 3  | 1 or 2                                                                                                                                                                                                                                                                                                                                                                                                                                                                                                                                               |
| 4  | Dietetics/ or Nutritionists/                                                                                                                                                                                                                                                                                                                                                                                                                                                                                                                         |
| 5  | (dieti#ian* or dietetic* or nutrition*).ti. or (dieti#ian* or dietetic* or nutrition*).ab.                                                                                                                                                                                                                                                                                                                                                                                                                                                           |
| 6  | 4 or 5                                                                                                                                                                                                                                                                                                                                                                                                                                                                                                                                               |
| 7  | nutrition therapy/ or diet therapy/ or nutritional support/ or professional role/ or "scope of practice"/                                                                                                                                                                                                                                                                                                                                                                                                                                            |
| 8  | (treatment* or counsel* or therap* or intervention* or care or consult* or recommend* or plan or advice or management or educat* or prescri* or support or role* or function*).ti. or (treatment* or counsel* or therap* or intervention* or care or consult* or recommend* or plan or advice or management or educat* or prescri* or support or role* or function*).ab.                                                                                                                                                                             |
| 9  | 7 or 8                                                                                                                                                                                                                                                                                                                                                                                                                                                                                                                                               |
| 10 | 3 and 6 and 9                                                                                                                                                                                                                                                                                                                                                                                                                                                                                                                                        |
